# Supplementary material for: In-vivo Histology of Parkinson’s Disease using Quantitative Multiparametric Mapping
Source: Research Square preprint supplement (doi:10.21203/rs.3.rs-7877710/v1), 2026-02-18
Supplement: Supplementary file 2 [file e58a2c0e88b2ce95ee626fac.docx]

**TABLES:**

**Table 1. Demographic and clinical characteristics.**

|  | **PwPD** | **HCs** | **p-value** |
| --- | --- | --- | --- |
| number | 31 | 68 |  |
| male/female | 13/18 | 28/40 | 1.000 1 |
| age (years) | 64.9 ± 9.3 [60.00 – 72.00] | 65.6 ± 8.1 [56.00 – 71.00] | .720 2 |
| MDS-UPDRS-III | 28.6 ± 15.5 [19.00 – 34.00] | n.a. |  |
| LEDD (mg/d) | 512.6 ± 365.6 [300.00 – 842.50] | n.a. |  |
| Disease duration (years) | 4.5 ± 4.3 [1.50 – 7.00] | n.a. |  |
| Hoehn and Yahr stage | 2 [1-2] | n.a. |  |
| MoCA | 26.7 ± 2.3 [25.50 – 28.00] | n.a |  |

Mean values and standard deviations are quoted. Values in square brackets represent the interquartile range. 1 according to a χ2-test; 2 two-sample t-test applied. HCs: healthy controls. LEDD: levodopa equivalent daily dose. MoCA: Montreal Cognitive Assessment. MDS-UPDRS-III: Movement Disorders Society’s Unified Parkinson’s Disease Rating Scale (subscore III). PwPD: patients with Parkinson’s disease.

|  | *cluster level* | | | | *peak level* | | *mm* | *mm* | *mm* |
| --- | --- | --- | --- | --- | --- | --- | --- | --- | --- |
| *P*FWE-corr | *q*FRD-corr | *K*E | *P*uncorr | *T* | (*Z*E) |
| **PwPD > HCs** | | | | | | | | | |
| lSMA | .000 | .000 | 466 | .000 | 5.80 | 5.56 | 0 | -11 | 76 |
| IOpIFG | .005 | .002 | 696 | .000 | 4.77 | 4.51 | -37 | 6 | 24 |
| lMCgG | .000 | .000 | 1280 | .000 | 4.54 | 4.31 | -9 | -13 | 37 |
| lCO | .001 | .000 | 258 | .000 | 4.24 | 4.05 | -48 | -9 | 23 |
| lMTG | .018 | .003 | 164 | .000 | 4.05 | 3.88 | -42 | -60 | 12 |
| lSMA | .005 | .001 | 199 | .000 | 3.95 | 3.79 | -13 | 8 | 43 |
| lTrIFG | .025 | .004 | 156 | .000 | 3.87 | 3.72 | -44 | 28 | 9 |
| rMCgG | .000 | .000 | 627 | .000 | 3.76 | 3.62 | 12 | -20 | 36 |
| lMCgG | .000 | .000 | 279 | .000 | 3.60 | 3.48 | -2 | 6 | 27 |
| **HCs > PwPD** | | | | | | | | | |
| lVD | .028 | .016 | 153 | .000 | 4.87 | 4.59 | -14 | -24 | -17 |
| lEnt | .000 | .000 | 457 | .000 | 4.20 | 4.01 | -13 | 3 | -25 |

**Table 2. Clusters with significant differences in R1 values between PwPD and HCs.**

The table presents the clusters demonstrating significant group differences in R1 values at the cluster level. FDR-corr: false-discovery rate-corrected. FWE-corr: family-wise error-corrected. HCs: healthy controls. KE: cluster extent. lCO: left central operculum. lEnt: left entorhinal area. lMCgG: left middle cingulate gyrus. lMTG: left middle temporal gyrus. lOpIFG: left opercular part of the inferior frontal gyrus. lSMA: left supplementary motor area. lTrIFG: left triangular part of the inferior frontal gyrus. lVD: left ventral diencephalon. PwPD: patients with Parkinson’s disease. R1: longitudinal relaxation rates. rMCgG: right middle cingulate gyrus. T: t-statistic. Uncorr: uncorrected. ZE: equivalent z-score.

**Table 3. Clusters with significant differences in R2* values between PwPD and HCs.**

|  | *cluster level* | | | | *peak level* | | *mm* | *mm* | *mm* |
| --- | --- | --- | --- | --- | --- | --- | --- | --- | --- |
| *P*FWE-corr | *q*FRD-corr | *K*E | *P*uncorr | *T* | (*Z*E) |
| **PwPD > HCs** | | | | | | | | | |
| lSMA | .002 | .001 | 612 | .000 | 6.01 | 5.51 | 0 | -11 | 76 |
| rMCgG | .000 | .000 | 8673 | .000 | 5.19 | 4.85 | 4 | 3 | 40 |
| lMPoG | .000 | .000 | 579 | .000 | 4.91 | 4.62 | -3 | -40 | 76 |
| rPCgG | .000 | .000 | 1135 | .000 | 4.27 | 4.07 | 13 | -46 | 29 |
| rAmygdala | .002 | .001 | 232 | .000 | 4.26 | 4.06 | 17 | -4 | -14 |
| lSMG | .014 | .003 | 179 | .000 | 4.10 | 3.93 | -58 | -36 | 36 |
| rSFG | .043 | .008 | 149 | .000 | 3.92 | 3.77 | 14 | 38 | 40 |
| lCE | .028 | .006 | 161 | .000 | 3.54 | 3.42 | -40 | -57 | -40 |
| **PwPD < HCs** | | | | | | | | | |
| lVD | .000 | .000 | 699 | .000 | 5.88 | 5.52 | -13 | -19 | -20 |
| lPCgG | .000 | .000 | 287 | .000 | 5.14 | 4.82 | -6 | -42 | 0 |
| lSPL | .043 | .008 | 149 | .000 | 5.09 | 4.77 | -24 | -40 | 47 |
| lCO | .000 | .000 | 488 | .000 | 4.37 | 4.16 | -38 | 2 | 10 |
| rOCP | .014 | .004 | 179 | .000 | 3.91 | 3.76 | 22 | -99 | -13 |
| rEnt | .037 | .008 | 153 | .000 | 3.86 | 3.73 | 15 | 6 | -27 |

The table presents the clusters demonstrating significant group differences in R2* values at the cluster level. FDR-corr: false-discovery rate-corrected. FWE-corr: family-wise error-corrected. HCs: healthy controls. lCO: left central operculum. lCE: left cerebellum exterior. lMPoG: left posterior gyrus medial segment. lPCgG: left posterior cingulate gyrus. lSMC: left supplementary area. lSMG: left supramarginal gyrus. lSPL: left superior parietal lobule. lVD: left ventral diencephalon. KE: cluster extent. PwPD: patients with Parkinson’s disease. R2*: effective transverse relaxation rate. rAmygdala: right amygdala. rEnt: right entorhinal area. rMCgG: right middle cingulate gyrus. rOCP: right occipital pole. rPCgG: right posterior cingulate gyrus. rSFG: right superior frontal gyrus. Uncorr: uncorrected. ZE: equivalent z-score.

**Table 4: Summary of association analysis between MPM-derived modalities and clinical variables in PwPD**.

| **Region**  **(cluster)** | **β / r** | | **SE** | **t** | **p-value** | **R2 with other predictors** | **VIF** | **R2** | **R2adj** | **RMSE** |
| --- | --- | --- | --- | --- | --- | --- | --- | --- | --- | --- |
| **Multiple Linear Regression – R2* and LEDD** | | | | | | | | | | |
| lSMA | | -5.24 | 17.45 | -0.301 | .766 | 0.54 | 2.18 | 0.33 | 0.13 | 272.72 |
| lMPoG | | 11.75 | 19.75 | 0.595 | .557 | 0.56 | 2.32 |  |  |  |
| rMCgG | | -89.78 | 55.78 | -1.609 | .121 | 0.70 | 3.40 |  |  |  |
| *rSFG* | | *157.83* | *71.26* | *2.215* | *.037* | *0.59* | *2.49* |  |  |  |
| lVD | | -12.17 | 18.61 | -0.654 | .520 | 0.24 | 1.32 |  |  |  |
| lCE | | 7.24 | 38.55 | 0.188 | .853 | 0.28 | 1.40 |  |  |  |
| **Multiple Linear Regression – R2* and MoCA** | | | | | | | | | | |
| rPCgG | | 0.17 | 0.14 | 1.20 | .241 | 0.36 | 1.57 | 0.38 | 0.25 | 1.77 |
| rMCgG | | -0.12 | 0.35 | -0.36 | .715 | 0.49 | 1.97 |  |  |  |
| *lMPoG* | | *0.63* | *0.28* | *2.23* | *.034* | *0.35* | *1.48* |  |  |  |
| lSMG | | 0.29 | 0.35 | 0.82 | .419 | 0.27 | 1.38 |  |  |  |
| rAmygdala | | -0.00 | 0.11 | -0.02 | .983 | 0.43 | 1.77 |  |  |  |
| **Multiple Linear Regression – MTsat and MDS-UPDRS-III** | | | | | | | | | | |
| *lSFG* | | *-14.24* | *6.66* | *-2.13* | *.042* | *0.14* | *1.16* | 0.25 | 0.13 | 13.15 |
| lMCgG | | -9.58 | 6.89 | -1.39 | .176 | 0.00 | 1.00 |  |  |  |
| CVL I-V | | 8.95 | 12.12 | 0.73 | .467 | 0.15 | 1.17 |  |  |  |
| rCE | | -16.75 | 11.42 | -1.46 | .155 | 0.01 | 1.01 |  |  |  |
| **Pearson’s correlation – Proton density and MoCA** | | | | | | | | | | |
| lSPL | | -0.442 |  |  | .021 |  |  |  |  |  |

The table lists the results from multiple linear regression and Pearson’s correlation analyses to probe the association between identified group differences across MPM modalities and clinical presentation in PwPD. Multiple linear regressions were performed with age and sex included as covariates. β: β coefficient. CVL I-V: cerebellar vermal lobules I-V. lCE: left cerebellum exterior. LEDD: levodopa-equivalent daily dose. lMCgG: left middle cingulate gyrus. lMPoG: left posterior gyrus medial segment. lPCgG: left posterior cingulate gyrus. lSFG: left superior frontal gyrus. lSMA: left supplementary motor area. lSMG: left supramarginal gyrus. lSPL: left superior parietal lobule. lVD: left ventral diencephalon. MDS-UPDRS-III: Movement Disorders Society’s Unified Parkinson’s Rating Scale (subscore III). MoCA: Montreal Cognitive Assessment. MPM: multiparametric mapping. MTsat: magnetic transfer saturation. PwPD: patients with Parkinson’s disease. r: correlation coefficient. R2: coefficient of determination. R2adj: adjusted coefficient of determination. R2*: effective transverse relaxation rate. rAmygdala: right amygdala. rCE: right cerebellum exterior. rMCgG: right middle cingulate gyrus. RMSE: root mean squared error. rPCgG: right posterior cingulate gyrus. rSFG: right superior frontal gyrus. SE: standard error. t: t-statistic. VIF: variance inflation factor.

**Table 5. Clusters with significant differences in proton density values between PwPD and HCs.**

|  | *cluster level* | | | | *peak level* | | *mm* | *mm* | *mm* |
| --- | --- | --- | --- | --- | --- | --- | --- | --- | --- |
| *P*FWE-corr | *q*FRD-corr | *K*E | *P*uncorr | *T* | (*Z*E) |
| **PwPD > HCs** | | | | | | | | | |
| lSMA | .000 | .000 | 314 | .000 | 5.99 | 5.51 | 0 | -11 | 76 |
| **HCs > PwPD** | | | | | | | | | |
| lSPL | .026 | .034 | 155 | .000 | 5.16 | 4.83 | -24 | -40 | 47 |

The table presents the clusters demonstrating significant group differences in proton density values at the cluster level. FDR-corr: false-discovery rate-corrected. FWE-corr: family-wise error-corrected. HCs: healthy controls. lSMA: left supplementary motor area. lSPL: left superior parietal lobule. KE: cluster extent. PwPD: patients with Parkinson’s disease. Uncorr: uncorrected. ZE: equivalent z-scores.

**Table 6. Clusters with significant differences in MTsat values between PwPD and HCs.**

|  | *cluster level* | | | | *peak level* | | *mm* | *mm* | *mm* |
| --- | --- | --- | --- | --- | --- | --- | --- | --- | --- |
| *P*FWE-corr | *q*FRD-corr | *K*E | *Puncorr* | *T* | *(ZE)* |
| **PwPD > HCs** | | | | | | | | | |
| lMTG | .000 | .000 | 613 | .000 | 5.65 | 5.24 | -41 | -59 | 14 |
| rMGO | .000 | .000 | 310 | .000 | 4.12 | 3.94 | 53 | -69 | -19 |
| rCE | .000 | .000 | 332 | .000 | 4.07 | 3.90 | 37 | -60 | -54 |
| lOpIFG | .000 | .000 | 289 | .000 | 4.00 | 3.83 | -35 | 6 | 23 |
| lMCgG | .000 | .000 | 360 | .000 | 3.91 | 3.76 | -9 | -11 | 38 |
| **HCs > PwPD** | | | | | | | | | |
| lSFG | .044 | .022 | 154 | .000 | 4.42 | 4.20 | -19 | -3 | 61 |
| CVL I-V | .000 | .000 | 307 | .000 | 3.87 | 3.72 | -1 | -44 | -7 |

The table presents the clusters demonstrating significant group differences in MTsat values at the cluster level. CVL I-V: cerebellar vermal lobules I-V. FDR-corr: false-discovery rate-corrected. FWE-corr: family-wise error-corrected. HCs: healthy controls. lMCgG: left middle cingulate gyrus. lMTG: left middle temporal gyrus. lOpIFG: left opercular part of the inferior frontal gyrus. lSFG: left superior frontal gyrus. KE: cluster extent. MTsat: magnetic saturation transfer. PwPD: patients with Parkinson’s disease. rCE: right cerebellum exterior. rMGO: right middle occipital gyrus. Uncorr: uncorrected. ZE: equivalent z-scores.
